# Supplementary material
Source: PubMed Central journal article supplement (PMC8120089)
Supplement: sj-pdf-1-vdi-10.1177_10406387211004106.pdf [file sj-pdf-1-vdi-10.1177_10406387211004106.pdf]

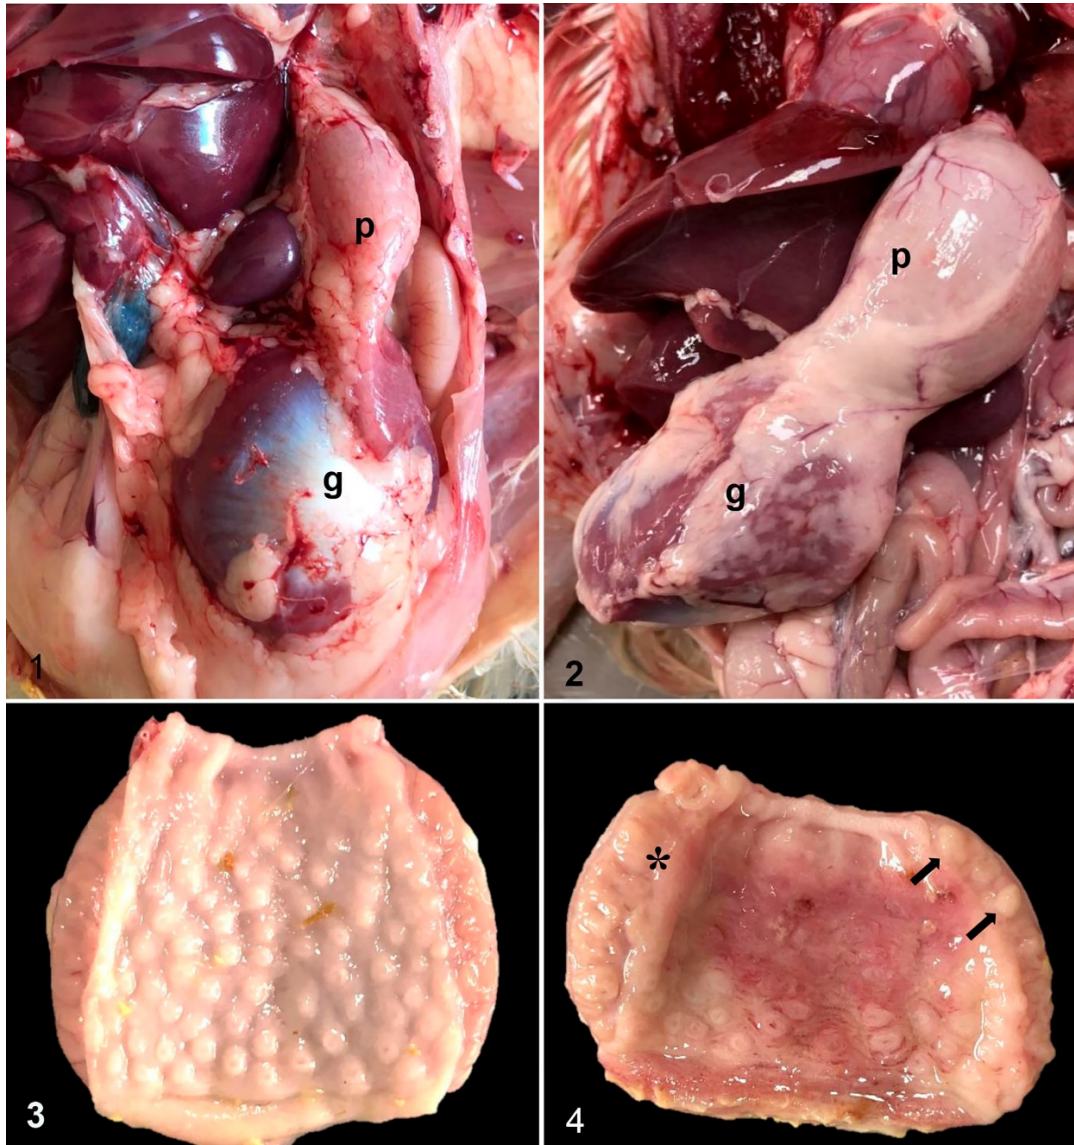

**Supplementary Figures 1–4.** Broilers unaffected and affected by transmissible viral proventriculitis. **Suppl. Fig. 1.** 42-d-old broiler with normal proventriculus (p) and gizzard (g). **Suppl. Fig. 2.** 33-d-old broiler with enlarged proventriculus (p) and gizzard (g). **Suppl. Fig. 3.** Opened normal proventriculus from a 42-d-old broiler. **Suppl. Fig. 4.** Longitudinal section of the proventriculus shown in Suppl. Fig. 2. Dilation and diffuse thickening of the mucosa (asterisk) with white nodules (arrows).
